# Supplementary material
Source: PubMed Central journal article supplement (PMC4581995)
Supplement: NIHMS714141-supplement-ESI.pdf [file NIHMS714141-supplement-ESI.pdf]

**Supporting Information**  
**Tuning steric and electronic effects in transition-metal  $\beta$ -diketiminato complexes**  
 Chi Chen, Sarina M. Bellows, and Patrick L. Holland

Table 1. Crystal data of metal complexes

| Complex                                                                     | N-M-N   | D(M-N)<br>(Å)  | C(aryl)-N-C( $\beta$ ) | Off plane<br>(Å) | Selected<br>Distance (Å)<br>Or dihedral angle | ref |
|-----------------------------------------------------------------------------|---------|----------------|------------------------|------------------|-----------------------------------------------|-----|
| $L^{\text{Me},i\text{Pr}}\text{ScCl}_2(\text{THF})$                         | 86.77   | 2.107<br>2.175 | 116.9<br>117.8         | 0.694            | Sc-Cl: 2.356<br>2.380                         | 1   |
| $L^{\text{tBu},i\text{Pr}}\text{ScCl}_2$                                    | 95.9    | 2.046<br>2.099 | 125.3<br>126.9         | 1.295            | Sc-Cl: 2.353<br>2.326                         | 2   |
| $L^{\text{Me},i\text{Pr}}\text{ScMe}_2(\text{THF})$                         | 85.2    | 2.190<br>2.201 | 117.7<br>118.2         | 0.815            | Sc-Cl: 2.209<br>2.245                         | 2   |
| $L^{\text{tBu},i\text{Pr}}\text{ScMe}_2$                                    | 92.2    | 2.103<br>2.145 | 124.5<br>127.5         | 1.262            | Sc-Cl: 2.221<br>2.220                         | 2   |
| $L^{\text{tBu},i\text{Pr}}\text{Sc}(\text{CH}_2\text{TMS})_2$               | 93.5    | 2.091<br>2.144 | 125.5<br>126.2         | 1.154            | Sc-C: 2.228<br>2.203                          | 2   |
| $L^{\text{Me},i\text{Pr}}\text{Sc}(\text{CH}_2\text{TMS})_2$                | 90.7    | 2.113<br>2.133 | 120.1<br>120.8         | 1.116            | Sc-C: 2.244<br>2.194                          | 2   |
| $L^{\text{Me},m\text{-tBu}}\text{Sc}(\text{CH}_2\text{TMS})_2$              | 83.1    | 2.128<br>2.128 | 121.6<br>122.1         | 0.489            | Sc-C: 2.210<br>2.215                          | 3   |
| $L^{\text{Me},m\text{-tIPP}}\text{Sc}(\text{CH}_2\text{SiMe}_2\text{Ph})_2$ | 84.9 °  | 2.127<br>2.123 | 120.4 °<br>119.2 °     | 0.204            | Sc-C: 2.203<br>2.202                          | 3   |
| $L^{\text{Me},\text{H}}\text{TiCl}_2(\text{THF})_2$                         | 87.5 °  | 2.089<br>2.086 | 116.8 °<br>117.1 °     | 0.224            | Ti-Cl: 2.400<br>2.389                         | 4   |
| $L^{\text{Me},i\text{Pr}}\text{TiCl}_2(\text{THF})$                         | 88.4 °  | 2.030<br>2.089 | 115.7 °<br>118.8 °     | 0.778            | Ti-Cl: 2.342<br>2.327                         | 5   |
| $L^{\text{Me},\text{Mes}}\text{TiCl}_2$                                     | 84.29 ° | 1.964<br>1.983 | 122.3 °<br>121.4 °     | 0.150            | Ti-Cl<br>2.295, 2.294                         | 6   |
| $L^{\text{tBu},\text{Mes}}\text{TiCl}_2$                                    | 83.9 °  | 1.986<br>1.986 | 128.5 °<br>128.5 °     | 0.000            | Ti-Cl<br>2.296, 2.296                         | 6   |
| $L^{\text{tBu},i\text{Pr}}\text{TiCl}_2$                                    | 94.35 ° | 2.052<br>1.955 | 126.98 °<br>123.70 °   | 1.069            | Ti-Cl<br>2.306, 2.276                         | 7   |
| $L^{\text{tBu},i\text{Pr}}\text{ZrCl}_3$                                    | 82.72 ° | 2.302<br>2.100 | 128.2 °<br>127.0 °     | 1.650            | Zr-Cl: 2.381, 2.453<br>2.428                  | 8   |
| $L^{\text{Me},i\text{Pr}}\text{ZrCl}_3$                                     | 83.62 ° | 2.202<br>2.202 | 114.6 °<br>114.6 °     | 0.820            | Zr-Cl: 2.395, 2.395<br>2.339                  | 9   |
| $L^{\text{Me},\text{H}}\text{VCl}_2(\text{THF})_2$                          | 90.93 ° | 2.023<br>2.030 | 116.3 °<br>117.6 °     | 0.227            | V-Cl: 2.359<br>2.365                          | 4   |
| $L^{\text{Me},\text{Me}}\text{VCl}_2$                                       | 93.99 ° | 1.940<br>1.963 | 118.8 °<br>120.5 °     | 0.528            | V-Cl: 2.235<br>2.241                          | 6   |
| $[L^{\text{Me},\text{Et}}\text{V}]_2$                                       | 88.69 ° | 2.066<br>2.041 | 115.84 °<br>114.05 °   | 1.750            | V-arene: 1.422<br>Two plane: 0 °              | 10  |
| $[L^{\text{Me},\text{Me}}\text{V}]_2$                                       | 88.73 ° | 2.057<br>2.034 | 115.98 °<br>113.22 °   | 1.744            | V-arene: 1.411<br>Two plane: 0 °              | 10  |
| $[L^{\text{Me},\text{An}}\text{V}]_2$                                       | 88.83 ° | 2.025<br>2.020 | 117.05 °<br>117.01 °   | 1.796            | V-arene: 1.744<br>Two Plane: 65.59 °          | 10  |
| $L^{\text{Me},\text{Me}}\text{Cr-Cp}$                                       | 91.43 ° | 2.018<br>2.015 | 118.88 °<br>116.4 °    | 0.001            | Cr-Cp 2.018                                   | 11  |
| $L^{\text{Me},\text{Et}}\text{Cr-Cp}$                                       | 90.4 °  | 2.028<br>2.026 | 118.9 °<br>119.3 °     | 0.253            | Cr-Cp 2.013                                   | 12  |
| $L^{\text{Me},i\text{Pr}}\text{Cr-Cp}$                                      | 92.44 ° | 2.036<br>2.028 | 120.5 °<br>118.6 °     | 0.130            | Cr-Cp 2.016                                   | 13  |
| $L^{\text{Me},i\text{Pr}}\text{Cr}(\text{Cl})(\text{Cp})$                   | 89.9 °  | 2.036<br>2.036 | 117.3 °<br>117.3 °     | 0.719            | Cr-Cl 2.292<br>Cr-Cp 1.929                    | 13  |
| $L^{\text{Me},\text{Et}}\text{Cr}(\text{Cl})(\text{Cp})$                    | 90.3 °  | 2.022<br>2.016 | 118.0 °<br>117.9 °     | 0.751            | Cr-Cl 2.297<br>Cr-Cp 1.901                    | 14  |
| $L^{\text{Me},\text{Me}}\text{Cr}(\text{Cl})(\text{Cp})$                    | 90.5 °  | 2.019<br>2.018 | 117.7 °<br>119.0 °     | 0.680            | Cr-Cl 2.308<br>Cr-Cp 1.897                    | 12  |
| $L^{\text{Me},\text{H}}\text{Cr}(\text{Cl})(\text{Cp})$                     | 90.8 °  | 1.994<br>2.001 | 119.0 °<br>119.2 °     | 0.087            | Cr-Cl 2.345<br>Cr-Cp 1.917                    | 15  |
| $L^{\text{Me},i\text{Pr}/p\text{-OMe}}\text{Cr}(\text{Cl})(\text{Cp})$      | 89.5 °  | 2.007          | 118.7 °                | 0.676            | Cr-Cr 2.305                                   | 16  |

| Complex                                                               | N-M-N              | D(M-N)<br>(Å)  | C(aryl)-N-C(β)                               | Off plane<br>(Å) | Cr-Cp 1.930<br>Selected<br>Distance (Å)<br>Or dihedral angle   | ref |
|-----------------------------------------------------------------------|--------------------|----------------|----------------------------------------------|------------------|----------------------------------------------------------------|-----|
| L <sup>Me,iPr</sup> Cr(Me)(Cp)                                        | 90.7 °             | 2.039<br>2.039 | 118.3 °<br>118.8 °                           | 0.702            | Cr-Me 2.072<br>Cr-Cp 1.972                                     | 13  |
| L <sup>Me,Et</sup> Cr(Me)(Cp)                                         | 90.2 °             | 2.029<br>2.017 | 118.7 °<br>118.3 °                           | 0.699            | Cr-Me 2.113<br>Cr-Cp 1.963                                     | 14  |
| L <sup>Me,Me</sup> Cr(Me)(Cp)                                         | 90.7 °             | 2.024<br>2.026 | 116.9 °<br>117.6 °                           | 0.65             | Cr-Me 2.064<br>Cr-Cp 1.966                                     | 14  |
| L <sup>Me,Me</sup> Cr(μ-Cl) <sub>2</sub> CrL (THF) <sub>2</sub>       | 89.77 °            | 2.063<br>2.059 | 117.3 °<br>118.3 °                           | 0.554            | Two ligand plane<br>0.0                                        | 17  |
| L <sup>Me,iPr</sup> Cr(μ-Cl) <sub>2</sub> CrL (THF) <sub>2</sub>      | 91.45 °            | 1.990<br>1.986 | 117.2 °<br>115.9 °                           | 0.668            | Two ligand plane<br>0.0                                        | 18  |
| L <sup>tBu,iPr</sup> Cr(μ-Cl) <sub>2</sub> CrL                        | 90.69 °            | 2.063<br>2.059 | 122.0 °<br>122.2 °                           | 0.060            | Two ligand plane:<br>32.41                                     | 19  |
| [L <sup>tBu,iPr</sup> FeH] <sub>2</sub>                               | 95.33 °            | 1.989<br>2.022 | 127.22 °<br>114.39 °                         | 0.565            | Two plane: 68.92<br>Fe-Fe: 2.624                               | 20  |
| [L <sup>Me,iPr</sup> FeH] <sub>2</sub>                                | 95.06 °            | 1.978<br>1.987 | 117.9 °<br>119.52 °                          | 0.540            | Two Plane:71.15<br>Fe-Fe: 2.464                                | 21  |
| [L <sup>Me,Me,Me</sup> FeH] <sub>2</sub>                              | 90.8 °             | 1.925<br>1.932 | 118.56 °<br>119.63 °                         | 0.260            | Two Plane:82.38<br>Fe-Fe: 2.501                                | 22  |
| L <sup>tBu,iPr</sup> FeH <sub>2</sub> B(Et) <sub>2</sub>              | 97.35 °            | 1.971<br>1.969 | 127.8 °<br>129.28 °                          | 0.093            | Fe-B: 2.232                                                    | 23  |
| L <sup>Me,iPr</sup> FeH <sub>2</sub> B(Et) <sub>2</sub>               | 95.91 °            | 1.971<br>1.971 | 120.58 °<br>120.58 °                         | 0.000            | Fe-B: 2.238                                                    | 23  |
| L <sup>tBu,iPr</sup> FeCl                                             | 96.35 °            | 1.946<br>1.946 | 128.39 °<br>128.39 °                         | 0.000            | Fe-Cl 2.172                                                    | 24  |
| [L <sup>Me,iPr</sup> FeCl] <sub>2</sub>                               | 94.5 °             | 2.006<br>2.002 | 116.61 °<br>116.72 °                         | 0.441            | Two plane 0<br>Fe-Cl: 2.405, 2.358                             | 25  |
| L <sup>Me,iPr</sup> FeCl <sub>2</sub> Li(THF) <sub>2</sub>            | 93.22 °            | 2.021<br>2.006 | 120.27 °<br>118.59 °                         | 0.381            | Fe-Cl; 2.338<br>2.324                                          | 24  |
| L <sup>Me,Me<sub>3</sub></sup> FeCl <sub>2</sub> Li(THF) <sub>2</sub> | 93.19 °            | 1.983<br>1.983 | 119.19 °<br>119.19 °                         | 0                | Fe-Cl: 2.325<br>2.325                                          | 26  |
| L <sup>tBu,iPr</sup> FeF                                              | 95.67 °            | 1.961<br>1.961 | 127.95 °<br>127.95 °                         | 0                | Fe-F: 1.808                                                    | 21  |
| [L <sup>Me,iPr</sup> FeF] <sub>2</sub>                                | 93.28 °            | 2.016<br>2.008 | 119.91 °<br>117.34 °                         | 0.456            | Fe-F: 1.976<br>1.977                                           | 21  |
| L <sup>tBu,iPr</sup> FeF(tBuPy)                                       | 97.8 °             | 2.007<br>2.015 | 124.8 °<br>126.43 °                          | 0.339            | Fe-F: 1.87<br>Ligand/py: 87.55                                 | 21  |
| L <sup>Me,iPr</sup> FeF(tBuPy)                                        | 95 °               | 2.009<br>2.012 | 118.38 °<br>119.53 °                         | 0.294            | Fe-F: 1.843<br>Ligand/Py: 88.07                                | 21  |
| L <sup>tBu,iPr</sup> Fe(tbuPy)NNFe(Py)L                               | 99.23 °<br>97.33 ° | 2.005<br>2.000 | 123.02 °<br>124.22 °<br>124.76 °<br>124.13 ° | 0.394<br>0.553   | Fe-NN 1.790, 1.800<br>Fe-Py 2.079, 2.107<br>Ligand plane 81.68 | 27  |
| L <sup>Me,iPr</sup> Fe(tbuPy)NNFe(Py)L                                | 95.86 °<br>95.86 ° | 2.005<br>1.993 | 118.59 °<br>119.99 °<br>118.59 °             | 0.250<br>0.250   | Fe-NN<br>Fe-Py<br>Ligand plane 50.04                           | 27  |
| [L <sup>tBu,iPr</sup> Fe-AdN <sub>3</sub> ] <sub>2</sub>              | 98.84 °            | 2.018<br>2.043 | 123.88 °<br>123.39 °                         | 0.762            | Ligand plane 0<br>Fe-N 2.013, 2.061                            | 28  |
| [L <sup>Me,iPr</sup> Fe-AdN <sub>3</sub> ] <sub>2</sub>               | 97.95 °            | 2.021<br>2.016 | 118.34 °<br>117.40 °                         | 0.753            | Ligand plane 0<br>Fe-N 2.003, 2.059                            | 28  |
| L <sup>tBu,iPr</sup> Fe-NNFeL                                         | 96.01 °            | 1.965<br>1.970 | 129.11 °<br>127.00 °                         | 0.011<br>0.009   | Two plane 87.18<br>Fe-N 1.77, 1.779                            | 29  |
| L <sup>Me,iPr</sup> Fe-NNFeL                                          | 94.78 °            | 1.945<br>1.984 | 121.57 °<br>118.66 °                         | 0.046            | Two plane 0<br>Fe-N 1.775                                      | 27  |
| [L <sup>tBu,iPr</sup> Fe-NNFeL]K <sub>2</sub>                         | 95.76 °            | 1.948<br>1.945 | 124.00 °<br>124.60 °                         | 0.29<br>0.111    | Two plane 35.7<br>Fe-N 1.759, 1.770                            | 29  |
| [L <sup>Me,iPr</sup> Fe-NNFeL]K <sub>2</sub>                          | 95.83 °            | 1.919<br>1.937 | 119.4 °<br>119.68 °                          | 0.004<br>0.072   | Two plane 34.3<br>Fe-N 1.749, 1.754                            | 27  |
| L <sup>tBu,iPr</sup> Fe-(EtC=CHet)                                    | 94.16 °            | 1.988<br>1.990 | 127.53 °<br>127.44 °                         | 0.063            | Fe-C 2.021                                                     | 20  |
| L <sup>Me,iPr</sup> Fe-(PhC=CHPh)                                     | 94.44 °            | 1.980          | 120.17 °                                     | 0.133            | Fe-C 2.017                                                     | 30  |

| Complex                                                                | N-M-N   | 1.977<br>D(M-N)<br>(Å) | 121.40 °<br>C(aryl)-N-C(β) | Off plane<br>(Å) | Selected<br>Distance (Å)<br>Or dihedral angle | ref |
|------------------------------------------------------------------------|---------|------------------------|----------------------------|------------------|-----------------------------------------------|-----|
| L <sup>tBu,iPr</sup> FeiPr                                             | 94.25 ° | 1.990<br>1.989         | 126.33 °<br>128.11 °       | 0.065            | Fe-C 2.055                                    | 31  |
| L <sup>Me,iPr</sup> FeiPr                                              | 92.78 ° | 1.983<br>1.983         | 119.84 °<br>120.60 °       | 0.019            | Fe-C 2.071                                    | 32  |
| L <sup>tBu,iPr</sup> Fe-(Ph-CCH)                                       | 96.16 ° | 1.975<br>2.005         | 123.65 °<br>124.62 °       | 0.097            | Fe-alkne 1.841                                | 33  |
| L <sup>Me,iPr</sup> Fe-(Ph-CCH)                                        | 93.67 ° | 1.973<br>1.990         | 119.31 °<br>118.57 °       | 0.008            | Fe-alkyn 1.831                                | 34  |
| [L <sup>Me,iPr</sup> CoCl] <sub>2</sub>                                | 96.47 ° | 1.972<br>1.971         | 116.50 °<br>116.12 °       | 0.498            | Co-Cl: 2.350<br>2.355                         | 35  |
| L <sup>tBu,iPr</sup> CoCl                                              | 99.48 ° | 1.902                  | 127.98 °                   | 0                | Co-Cl: 2.140                                  | 36  |
| L <sup>tBu,iPr</sup> Co(Cl) <sub>2</sub> Li(THF) <sub>2</sub>          | 99.42 ° | 1.968<br>1.961         | 124.78 °<br>125.81 °       | 0.362            | Co-Cl 2.294, 2.302                            | 36  |
| L <sup>Me,iPr</sup> Co(Cl) <sub>2</sub> Li(THF) <sub>2</sub>           | 98.19 ° | 1.957<br>1.962         | 120.23 °<br>120.38 °       | 0.314            | Co-Cl 2.296, 2.294                            | 37  |
| L <sup>tBu,iPr</sup> Co(alkyl)                                         | 97.68 ° | 1.950<br>1.960         | 125.04 °<br>127.59 °       | 0.030            | Co-C 2.011                                    | 38  |
| L <sup>Me,iPr</sup> Co(CH <sub>2</sub> TMS)                            | 95.6 °  | 1.948<br>1.946         | 119.7 °<br>118.82 °        | 0.056            | Co-C 1.999                                    | 39  |
| L <sup>Me,iPr</sup> NiP <sub>4</sub> NiL                               | 94.98 ° | 1.947<br>1.968         | 117.74 °<br>116.94 °       | 0.184<br>0.184   | Two plane 39.96<br>Ni-P: 2.217, 2.339, 2.195  | 40  |
| L <sup>Me,Et</sup> NiP <sub>4</sub> NiL                                | 96.44 ° | 1.931<br>1.928         | 119.86 °<br>115.87 °       | 0.030<br>0.215   | Two plane 51.24<br>Ni-P: 2.203, 2.329, 2.167  | 40  |
| L <sup>tBu,iPr</sup> NiCl                                              | 97.28 ° | 1.815<br>1.815         | 130.27 °<br>130.27 °       | 0                | Ni-Cl: 2.137                                  | 36  |
| [L <sup>Me,iPr</sup> NiCl] <sub>2</sub>                                | 93.66 ° | 1.938<br>1.946         | 117.11 °<br>116.42 °       | 0.342            | Two plane: 0<br>Ni-Cl: 2.325, 2.350           | 41  |
| [L <sup>Me,Me</sup> NiCl] <sub>2</sub>                                 | 94.7 °  | 1.915<br>1.913         | 117.88 °<br>117.30 °       | 0.353            | Two plane: 0<br>Ni-Cl: 2.300, 2.313           | 42  |
| L <sup>tBu,iPr</sup> NiCO                                              | 98.85 ° | 1.924<br>1.856         | 126.33 °<br>129.40 °       | 0.017            | Ni-C: 1.777                                   | 43  |
| L <sup>Me,iPr</sup> NiCO                                               | 96.41 ° | 1.917<br>1.868         | 119.89 °<br>122.58 °       | 0.018            | Ni-C: 1.770                                   | 44  |
| [L <sup>Me,Me</sup> NiCO] <sub>2</sub>                                 | 95.0 °  | 1.927<br>1.913         | 114.95 °<br>118.08 °       | 0.460            | Ni-C: 1.759<br>2.079                          | 45  |
| <sup>Ph</sup> L <sup>H,iPr</sup> Cu-PPh <sub>3</sub>                   | 96.17 ° | 1.956<br>1.954         | 116.74 °<br>116.39 °       | 0.189            | Cu-P: 2.165                                   | 46  |
| <sup>Ph</sup> L <sup>H,H</sup> Cu(PPh <sub>3</sub> ) <sub>2</sub>      | 93.14 ° | 2.053<br>2.053         | 114.73 °                   | 0                | Cu-P: 2.292<br>2.292                          | 46  |
| <sup>H</sup> L <sup>Me,Me</sup> Cu(PPh <sub>3</sub> )                  | 96.86 ° | 1.947<br>1.955         | 119.01 °<br>119.70 °       | 0.131            | Cu-P: 2.166                                   | 47  |
| <sup>H</sup> L <sup>Me,iPr</sup> Cu(PPh <sub>3</sub> )                 | 97.84 ° | 1.968<br>1.975         | 117.62 °<br>118.05 °       | 0.210            | Cu-P: 2.181                                   | 48  |
| <sup>H</sup> L <sup>Me,Me3</sup> Cu(PPh <sub>3</sub> )                 | 97.76 ° | 1.956<br>1.940         | 119.16 °<br>119.04 °       | 0.177            | Cu-P: 2.161                                   | 49  |
| <sup>H</sup> L <sup>CF3,m-CF3</sup> Cu(PPh <sub>3</sub> ) <sub>2</sub> | 94.65 ° | 2.093                  | 119.75 °<br>119.75 °       | 0                | Cu-P: 2.295                                   | 50  |
| L <sup>Me,iPr/Et-pCN</sup> Cu(OAc)                                     | 96.73 ° | 1.901<br>1.895         | 119.39 °<br>117.56 °       | 0.145            | Cu-O: 2.032<br>2.011                          | 51  |
| L <sup>Me,iPr/Me-pCN</sup> Cu(OAc)                                     | 96.26 ° | 1.905<br>2.004         | 119.56 °<br>119.89 °       | 0.214            | Cu-O: 2.034<br>2.004                          | 51  |
| L <sup>Me,iPr-pCN</sup> Cu(OAc)                                        | 96.79 ° | 1.902<br>1.898         | 119.86 °<br>118.50 °       | 0.096            | Cu-O: 2.015<br>2.002                          | 51  |
| L <sup>Me,Et-pCN</sup> Cu(OAc)                                         | 95.77 ° | 1.914<br>1.901         | 119.96 °<br>121.37 °       | 0.156            | Cu-O: 2.006<br>2.032                          | 51  |
| <sup>CN</sup> L <sup>Me,iPr</sup> Cu(OAc)                              | 96.63 ° | 1.905<br>1.914         | 119.68 °<br>120.45 °       | 0.246            | Cu-O: 2.012<br>2.000                          | 52  |
| L <sup>Me,iPr</sup> Cu(OAc)                                            | 96.91 ° | 1.905<br>1.905         | 119.19 °<br>119.19 °       | 0                | Cu-O: 2.011<br>2.011                          | 53  |

| Complex                                                   | N-M-N   | D(M-N)<br>(Å)           | C(aryl)-N-C(β)       | Off plane<br>(Å) | Selected<br>Distance (Å)<br>Or dihedral angle | ref |
|-----------------------------------------------------------|---------|-------------------------|----------------------|------------------|-----------------------------------------------|-----|
| <sup>CN</sup> L <sup>H,iPr</sup> Cu(OAc)                  | 94.79 ° | 1.944<br>1.944          | 116.9 °<br>116.9 °   | 0.243            | Cu-O: 2.028<br>2.028                          | 54  |
| L <sup>Me,Et</sup> Cu(OAc)                                | 96.90 ° | 1.921<br>1.920          | 120.18 °<br>118.26 ° | 0.071            | Cu-O: 2.021<br>2.034                          | 53  |
| L <sup>Me,Me3</sup> Cu(OAc)                               | 94.99 ° | 1.916<br>1.913          | 118.09 °<br>119.00 ° | 0.403            | Cu-O: 2.029<br>2.027                          | 55  |
| L <sup>Me,Me</sup> Cu(OAc)                                | 96.30 ° | 1.910<br>1.899          | 119.69 °<br>119.48 ° | 0.285            | Cu-O; 2.015<br>2.022                          | 56  |
| [L <sup>Me,Et/iPr-pNO2</sup> Cu(OH)] <sub>2</sub>         | 93.18 ° | 1.960<br>1.956          | 118.09 °<br>115.32 ° | 0.179            | Two Plane:0<br>Cu-O:1.928<br>1.942            | 51  |
| [L <sup>Me,Me</sup> Cu(OH)] <sub>2</sub>                  | 94.83 ° | 1.937<br>1.945          | 117.36 °<br>117.61 ° | 0.335            | Two Plane:0<br>Cu-O:1.923<br>1.914            | 57  |
| [L <sup>CF3,Me</sup> Cu(OH)] <sub>2</sub>                 | 95.28 ° | 1.940<br>1.943          | 122.69 °<br>122.87 ° | 0.274<br>0.149   | Two Plane:60.03<br>Cu-O:1.911<br>1.912        | 58  |
| [ <sup>CN</sup> L <sup>H,Me3</sup> Cu(OH)] <sub>2</sub>   | 93.35 ° | 1.946<br>1.958<br>1.962 | 117.29 °<br>117.62 ° | 0.586<br>0.532   | Two Plane:11.34<br>Cu-O:1.904<br>1.922, 1.920 | 54  |
| [ <sup>CN</sup> L <sup>H,Et</sup> Cu(OH)] <sub>2</sub>    | 93.63 ° | 1.943<br>1.955          | 115.44 °<br>115.90 ° | 0.354            | Two Plane:0<br>Cu-O:1.926<br>1.909            | 54  |
| [ <sup>NO2</sup> L <sup>H,Me3</sup> Cu(OH)] <sub>2</sub>  | 94.34 ° | 1.933<br>1.941          | 117.42 °<br>116.98 ° | 0.069            | Two Plane:40.86<br>Cu-O:1.910<br>1.905        | 59  |
| L <sup>Me,Me</sup> CuOtBu                                 | 96.17 ° | 1.890<br>1.879          | 121.00 °<br>121.34 ° | 0.246            | Cu-O: 1.788                                   | 60  |
| L <sup>Me,Cl</sup> CuOtBu                                 | 96.26 ° | 1.884<br>1.890          | 122.04 °<br>121.38 ° | 0.002            | Cu-O: 1.785                                   | 61  |
| L <sup>Me,Me</sup> Cu-CNXYl                               | 98.08 ° | 1.933<br>1.946          | 119.9 °<br>119.74 °  | 0.144            | Cu-C: 1.822                                   | 62  |
| L <sup>Me,iPr</sup> Cu-CNXYl                              | 98.20 ° | 1.928<br>1.962          | 119.81 °<br>120.13 ° | 0.342            | Cu-C: 1.817                                   | 63  |
| L <sup>Me,Me3</sup> Cu-CNXYl                              | 97.85 ° | 1.926<br>1.946          | 118.21 °<br>119.65 ° | 0.097            | Cu-C: 1.814                                   | 49  |
| <sup>CN</sup> L <sup>H,iPr</sup> Cu-(S) <sub>2</sub> CuL  | 97.53 ° | 1.920<br>1.910          | 115.39 °<br>115.27 ° | 0.226            | Two plane:0<br>Cu-S:2.199<br>2.209            | 64  |
| <sup>H</sup> L <sup>Me,Et</sup> Cu-(S) <sub>2</sub> CuL   | 99.30 ° | 1.907<br>1.910          | 118.43 °<br>118.18 ° | 0.174            | Two plane:0<br>Cu-S: 2.197<br>2.193           | 65  |
| <sup>H</sup> L <sup>Me,Me</sup> Cu-(S) <sub>2</sub> CuL   | 99.43 ° | 1.899<br>1.896          | 119.65 °<br>119.17 ° | 0.280            | Two plane:0<br>Cu-S:2.184<br>2.187            | 66  |
| <sup>H</sup> L <sup>tBu,iPr</sup> Cu-(S) <sub>2</sub> CuL | 99.51 ° | 1.936<br>1.942          | 123.13 °<br>122.73 ° | 0.037            | Two plane:33.32<br>Cu-S:2.267<br>2.257        | 66  |
| <sup>Ph</sup> L <sup>H,Et</sup> Cu-(S) <sub>2</sub> CuL   | 96.92 ° | 1.911<br>1.909          | 116.96 °<br>117.21 ° | 0.302            | Two plane:0<br>Cu-S:2.195<br>2.194            | 66  |
| <sup>Ph</sup> L <sup>H,iPr</sup> Cu-(S) <sub>2</sub> CuL  | 96.95 ° | 1.913<br>1.905          | 116.70 °<br>115.97 ° | 0.349            | Two plane:0<br>Cu-S:2.198<br>2.205            | 66  |
| <sup>ArF</sup> L <sup>H,Me</sup> Cu-(S) <sub>2</sub> CuL  | 98.07 ° | 1.906<br>1.912          | 115.21 °<br>117.26 ° | 0.002            | Two plane:0<br>Cu-S:2.198<br>2.198            | 66  |
| <sup>ArF</sup> L <sup>H,iPr</sup> Cu-(S) <sub>2</sub> CuL | 97.07 ° | 1.921<br>1.905          | 115.47 °<br>116.00 ° | 0.271            | Two plane: 0<br>Cu-S:2.194<br>2.206           | 66  |

| Complex                          | N-M-N    | D(M-N)<br>(Å)  | C(aryl)-N-C(β)       | Off plane<br>(Å) | Selected<br>Distance (Å)<br>Or dihedral angle | ref |
|----------------------------------|----------|----------------|----------------------|------------------|-----------------------------------------------|-----|
| $L^{Me,IPr}Cu(CO)$               | 99.42 °  | 1.921<br>1.917 | 118.57 °<br>118.29 ° | 0.126            | Cu-C: 1.784<br>C-O: 1.128                     | 67  |
| $L^{CF_3,IPr}Cu(CO)$             | 98.99 °  | 1.932<br>1.940 | 122.69 °<br>123.86 ° | 0.001            | Cu-C: 1.793<br>C-O 1.129                      | 67  |
| $L^{CF_3,Me}Cu-(NCCH_3)$         | 99.02 °  | 1.903<br>1.998 | 125.47 °<br>122.07 ° | 0.026            | Cu-N: 1.871                                   | 58  |
| $^{ArF}L^{H,IPr}Cu-(NCCH_3)$     | 97.57 °  | 1.908<br>1.977 | 117.00 °<br>118.94 ° | 0.068            | Cu-N: 1.862                                   | 59  |
| $^{NO_2}L^{H,IPr}Cu-(NCCH_3)$    | 96.95 °  | 1.934<br>1.987 | 118.51 °<br>117.74 ° | 0.306            | Cu-N: 1.857                                   | 68  |
| $L^{CF_3/Me,IPr}Cu-(NCCH_3)$     | 99.04 °  | 1.934<br>1.931 | 122.91 °<br>119.37 ° | 0.022            | Cu-N: 1.866                                   | 67  |
| $L^{CF_3,IPr}Cu-(NCCH_3)$        | 98.98 °  | 1.940<br>1.935 | 124.74 °<br>125.00 ° | 0.028            | Cu-N 1.870                                    | 67  |
| $L^{tBu,IPr}Cu-(NCCH_3)$         | 102.33 ° | 1.936<br>1.931 | 128.75 °<br>127.68 ° | 0.046            | Cu-N 1.946                                    | 69  |
| $L^{Me,IPr}Cu-(NCCH_3)$          | 98.98 °  | 1.940<br>1.942 | 118.94 °<br>119.21 ° | 0.018            | Cu-N 1.864                                    | 69  |
| $^{Ph}L^{H,IPr}Cu-(NCCH_3)$      | 97.25 °  | 1.964<br>1.950 | 116.59 °<br>118.46 ° | 0.142            | Cu-N 1.860                                    | 69  |
| $[L^{Cl,Me,Me}CuCl]_2$           | 94.67 °  | 1.919<br>1.922 | 119.58 °<br>120.80 ° | 0.176            | Two Plane:74.96<br>Cu-Cl 2.332<br>2.309       | 59  |
| $[L^{Me,Et}CuCl]_2$              | 95.59 °  | 1.929<br>1.930 | 117.47 °<br>118.67 ° | 0.258            | Two Plane:0<br>Cu-Cl:2.327, 2.319             | 59  |
| $L^{Me,IPr}CuCl$                 | 97.22 °  | 1.869<br>1.871 | 122.05 °<br>122.74 ° | 0.037            | Cu-Cl: 2.126                                  | 70  |
| $^{Cl}L^{Me,IPr}CuCl$            | 96.10 °  | 1.884<br>1.869 | 123.20 °<br>122.25 ° | 0.035            | Cu-Cl 2.123                                   | 63  |
| $[L^{Me,Cl}CuCl]_2$              | 95.35 °  | 1.930<br>1.931 | 117.34 °<br>119.9 °  | 0.377            | Two Plane: 81.37<br>Cu-Cl: 2.307, 2.338       | 61  |
| $L^{Me,m-CF_3}Ru(Cl)(Benzene)$   | 88.27 °  | 2.103<br>2.115 | 117.49 °<br>118.41 ° | 0.074            | Ru-Cl:2.464<br>Ru-Benzene:1.714               | 71  |
| $L^{CF_3,Me}Ru(Cl)(Benzene)$     | 88.10 °  | 2.127<br>2.115 | 119.02 °<br>120.74 ° | 0.624            | Ru-Cl:2.463<br>Ru-Benzene: 1.673              | 71  |
| $L^{CF_3,m-CF_3}Ru(Cl)(Benzene)$ | 87.77 °  | 2.108<br>2.106 | 120.44 °<br>120.01 ° | 0.246            | Ru-Cl: 2.414<br>Ru-Benzene: 1.703             | 71  |
| $L^{Me,H}Ru(Cl)(Benzene)$        | 88.52 °  | 2.102<br>2.105 | 117.97 °<br>118.34 ° | 0.048            | Ru-Cl:2.461<br>Ru-Benzene: 1.689              | 71  |
| $L^{Me,m-Me}Ru(Cl)(Benzene)$     | 88.21 °  | 2.098<br>2.091 | 117.53 °<br>117.38 ° | 0.207            | Ru-Cl:2.453<br>Ru-Benzene:1.683               | 72  |
| $L^{Me,Me}Ru(Cl)(Benzene)$       | 86.56 °  | 2.099<br>2.099 | 116.80 °<br>116.80 ° | 0.635            | Ru-Cl: 2.521<br>Ru-Benzene:1.688              | 73  |
| $L^{Me,Me}Ru(Cl)(Cp^*)$          | 87.51 °  | 2.089<br>2.075 | 114.98 °<br>115.14 ° | 0.628            | Ru-Cl: 2.461<br>Ru-Cp*:1.889                  | 74  |
| $L^{Me,m-Me}Ru(Cl)(Cp^*)$        | 87.83 °  | 2.050<br>2.051 | 116.43 °<br>115.98 ° | 0.343            | Ru-Cl:2.451<br>Ru-Cp*: 1.869                  | 74  |
| $L^{Me,m-CF_3}Ru(Cl)(Cp^*)$      | 87.99 °  | 2.071<br>2.071 | 114.91 °<br>115.46 ° | 0.004            | Ru-Cl: 2.439<br>Ru-Cp*:1.864                  | 74  |
| $L^{CF_3,m-Me}Ru(Cl)(Cp^*)$      | 90.18 °  | 2.069<br>2.055 | 118.55 °<br>118.42 ° | 0.208            | Ru-Cl: 2.431<br>Ru-Cp*: 1.886                 | 74  |
| $L^{CF_3,m-CF_3}Ru(Cl)(Cp^*)$    | 89.67 °  | 2.070<br>2.071 | 117.47 °<br>118.21 ° | 0.179            | Ru-Cl: 2.430<br>Ru-Cp*: 1.881                 | 74  |
| $L^{Me,Me}Ru(Cp^*)$              | 87.23 °  | 2.070<br>2.060 | 114.36 °<br>113.70 ° | 0.001            | Ru-Cp*:1.819                                  | 74  |
| $L^{Me,m-Me}Ru(Cp^*)$            | 87.92 °  | 2.060<br>2.063 | 115.62 °<br>115.29 ° | 0.079            | Ru-Cp*: 1.809                                 | 74  |
| $L^{Me,m-CF_3}Ru(Cp^*)$          | 87.37 °  | 2.045<br>2.040 | 114.08 °<br>114.07 ° | 0.043            | Ru-Cp*:1.798                                  | 74  |

| Complex                         | N-M-N              | D(M-N)<br>(Å)                    | C(aryl)-N-C(β)                               | Off plane<br>(Å) | Selected<br>Distance (Å)<br>Or dihedral angle | ref |
|---------------------------------|--------------------|----------------------------------|----------------------------------------------|------------------|-----------------------------------------------|-----|
| $L^{CF_3, m-Me}Ru(Cp^*)$        | 90.08 °            | 2.050<br>2.050                   | 116.95 °<br>117.42 °                         | 0.025            | Ru-Cp*:1.824                                  | 74  |
| $L^{CF_3, m-CF_3}Ru(Cp^*)$      | 89.55 °            | 2.055<br>2.056                   | 116.09 °<br>116.53 °                         | 0.075            | Ru-Cp*:1.827                                  | 74  |
| $L^{Me, H}Ru(Cp^*)$             | 87.68 °            | 2.053<br>2.046                   | 113.89 °<br>113.74 °                         | 0.006            | Ru-Cp*: 1.800                                 | 75  |
| $L^{Me, Me}Ru-(Benzene)(OTf)$   | 88.50 °            | 1.995<br>1.997                   | 116.6 °<br>116.00 °                          | 0.087            | Ru-Benzene: 1.705                             | 73  |
| $L^{Me, m-Me}Ru-(Benzene)(OTf)$ | 89.07 °            | 2.008<br>2.005                   | 115.88 °<br>116.55 °                         | 0.110            | Ru-Benzene: 1.703                             | 72  |
| $[L^{Me, H}Pd(\mu-OAc)]_2$      | 90.26 °<br>91.56 ° | 1.989<br>1.989<br>1.985<br>1.994 | 120.35 °<br>120.65 °<br>121.11 °<br>119.74 ° | 0.592<br>0.565   | Pd-O: 2.061<br>2.054<br>2.062<br>2.054        | 76  |
| $L^{Me, iPr}Pd(OAc)$            | 92.05 °            | 1.971<br>1.964                   | 120.72 °<br>122.18 °                         | 0.034            | Pd-O: 2.118<br>2.089                          | 76  |
| $[L^{Cl, Me, H}Pd(OAc)]_2$      | 87.41 °<br>90.67 ° | 1.997<br>1.983<br>1.980<br>1.989 | 119.08 °<br>121.12 °<br>119.78 °<br>120.13 ° | 0.886<br>0.488   | Pd-O:<br>2.050<br>2.042                       | 77  |
| $[L^{Me, iPr}Pd(\mu-Cl)]_2$     | 91.78 °            | 2.023<br>2.013                   | 118.65 °<br>117.87 °                         | 0.294            | Two plane: 0<br>Pd-Cl: 2.366<br>2.354         | 78  |
| $[L^{Me, m-CF_3}Pd(\mu-Cl)]_2$  | 90.93 °            | 2.006<br>1.989                   | 118.57 °<br>118.97 °                         | 0.468            | Two Plane:0<br>Pd-Cl: 2.350, 2.352            | 78  |
| $[L^{Me, H}Pd(\mu-Cl)]_2$       | 91.30 °            | 2.000<br>2.001                   | 118.20 °<br>120.61 °                         | 0.473            | Two Plane: 0<br>Pd-Cl: 2.342<br>2.356         | 77  |
| $L^{Me, iPr}Pd(Cl)(Py)$         | 91.70 °            | 2.031<br>2.014                   | 118.19 °<br>116.65 °                         | 0.178            | Pd-Cl: 2.315<br>Pd-Py: 2.078                  | 78  |
| $L^{Me, m-CF_3}Pd(Cl)(Py)$      | 90.08 °            | 2.026<br>2.013                   | 119.46 °<br>120.11 °                         | 0.686            | Pd-Cl: 2.302<br>Pd-Py: 2.039                  | 78  |
| $L^{Me, F_5}Rh(COD)$            | 88.4 °             | 2.090<br>2.104                   | 115.00 °<br>114.64 °                         | 0.450            | Rh-alkene: 2.031<br>2.024                     | 79  |
| $L^{Me, Me}Rh(COD)$             | 89.21 °            | 2.095<br>2.095                   | 114.18 °<br>114.18 °                         | 0                | Rh-alkene: 2.043                              | 80  |
| $L^{Me, F_5}Rh(CNtBu)_2$        | 88.39 °            | 2.074<br>2.067                   | 117.59 °<br>116.61 °                         | 0.204            | Rh-C: 1.892<br>1.893                          | 79  |
| $L^{Me, Me}Rh(CNtBu)_2$         | 90.38 °            | 2.067<br>2.073                   | 116.80 °<br>117.52 °                         | 0.176            | Rh-C: 1.905<br>1.895                          | 79  |
| $L^{Me, F_5}Rh(CO)_2$           | 88.91 °            | 2.052<br>2.057                   | 118.11 °<br>117.66 °                         | 0.121            | Rh-C: 1.864<br>1.871                          | 79  |
| $L^{Me, p-Cl}Rh(CO)_2$          | 89.87 °            | 2.052<br>2.045                   | 118.04 °<br>116.45 °                         | 0.000            | Rh-C: 1.874<br>1.853                          | 81  |
| $L^{Me, iPr}Rh(CO)_2$           | 89.78 °            | 2.049<br>2.051                   | 118.03 °<br>117.23 °                         | 0.066            | Rh-C: 1.869<br>1.871                          | 82  |

Table 2. Selected Reduction Potential on Substituents<sup>a</sup>

| Complex                                   | Ligand                                       | Reduction potential <sup>a</sup><br>(V) | Reference |
|-------------------------------------------|----------------------------------------------|-----------------------------------------|-----------|
| LRu(Cl)(η <sup>5</sup> -Cp <sup>*</sup> ) | L <sup>Me,Me</sup>                           | 0.39                                    | 74        |
|                                           | L <sup>Me,m-Me</sup>                         | 0.30                                    |           |
|                                           | L <sup>Me,m-CF<sub>3</sub></sup>             | 0.56                                    |           |
|                                           | L <sup>CF<sub>3</sub>,m-Me</sup>             | 0.48                                    |           |
|                                           | L <sup>CF<sub>3</sub>,m-CF<sub>3</sub></sup> | -0.25                                   |           |
| LRu(η <sup>5</sup> -Cp <sup>*</sup> )     | L <sup>Me,Me</sup>                           | 0.36                                    |           |
|                                           | L <sup>Me,m-Me</sup>                         | 0.36                                    |           |
|                                           | L <sup>Me,m-CF<sub>3</sub></sup>             | 0.16                                    |           |
|                                           | L <sup>CF<sub>3</sub>,m-Me</sup>             | 0.48                                    |           |
|                                           | L <sup>CF<sub>3</sub>,m-CF<sub>3</sub></sup> | 0.05                                    |           |

<sup>a</sup> Conditions: in THF, 0.026 M [Bu<sub>4</sub>N]BARf as supporting electrolyte, potentials referenced to external Fc<sup>+</sup>/Fc.

## Reference:

1. L. W. M. Lee, W. E. Piers, M. R. J. Elsegood, W. Clegg and M. Parvez, *Organometallics*, 1999, 18, 2947-2949.
2. P. G. Hayes, W. E. Piers, L. W. M. Lee, L. K. Knight, M. Parvez, M. R. J. Elsegood and W. Clegg, *Organometallics*, 2001, 20, 2533-2544.
3. A. L. Kenward, J. A. Ross, W. E. Piers and M. Parvez, *Organometallics*, 2009, 28, 3625-3628.
4. W.-K. Kim, M. J. Fevola, L. M. Liable-Sands, A. L. Rheingold and K. H. Theopold, *Organometallics*, 1998, 17, 4541-4543.
5. F. Basuli, B. C. Bailey, J. Tomaszewski, J. C. Huffman and D. J. Mindiola, *J. Am. Chem. Soc.*, 2003, 125, 6052-6053.
6. P. H. M. Budzelaar, A. B. van Oort and A. G. Orpen, *Eur. J. Inorg. Chem.*, 1998, 1998, 1485-1494.
7. F. Basuli, B. C. Bailey, L. A. Watson, J. Tomaszewski, J. C. Huffman and D. J. Mindiola, *Organometallics*, 2005, 24, 1886-1906.
8. F. Basuli, U. J. Kilgore, D. Brown, J. C. Huffman and D. J. Mindiola, *Organometallics*, 2004, 23, 6166-6175.
9. L. Kakaliou, Scanlon, B. Qian, S. W. Baek, M. R. Smith and D. H. Motry, *Inorg. Chem.*, 1999, 38, 5964-5977.
10. K.-C. Chang, C.-F. Lu, P.-Y. Wang, D.-Y. Lu, H.-Z. Chen, T.-S. Kuo and Y.-C. Tsai, *Dalton Trans.*, 2011, 40, 2324-2331.
11. Y. Champouret, U. Baisch, R. Poli, L. Tang, J. L. Conway and K. M. Smith, *Angew. Chem. Int. Ed.*, 2008, 47, 6069-6072.
12. Y. Champouret, K. C. MacLeod, U. Baisch, B. O. Patrick, K. M. Smith and R. Poli, *Organometallics*, 2010, 29, 167-176.
13. J. C. Doherty, K. H. D. Ballem, B. O. Patrick and K. M. Smith, *Organometallics*, 2004, 23, 1487-1489.
14. K. C. MacLeod, J. L. Conway, L. Tang, J. J. Smith, L. D. Corcoran, K. H. D. Ballem, B. O. Patrick and K. M. Smith, *Organometallics*, 2009, 28, 6798-6806.
15. Y.-B. Huang and G.-X. Jin, *Dalton Trans.*, 2009, DOI: 10.1039/b820798b, 767-769.
16. W. Zhou, L. Tang, B. O. Patrick and K. M. Smith, *Organometallics*, 2011, 30, 603-610.
17. F. Charbonneau, P. O. Oguadinma and F. Schaper, *Inorg. Chim. Acta*, 2010, 363, 1779-1784.
18. Vernon C. Gibson, C. Newton, C. Redshaw, Gregory A. Solan, Andrew J. P. White and David J. Williams, *Eur. J. Inorg. Chem.*, 2001, 2001, 1895-1903.
19. H. Fan, D. Adhikari, A. A. Saleh, R. L. Clark, F. J. Zuno-Cruz, G. Sanchez Cabrera, J. C. Huffman, M. Pink, D. J. Mindiola and M.-H. Baik, *J. Am. Chem. Soc.*, 2008, 130, 17351-17361.
20. J. M. Smith, R. J. Lachicotte and P. L. Holland, *J. Am. Chem. Soc.*, 2003, 125, 15752-15753.
21. J. Vela, J. M. Smith, Y. Yu, N. A. Ketterer, C. J. Flaschenriem, R. J. Lachicotte and P. L. Holland, *J. Am. Chem. Soc.*, 2005, 127, 7857-7870.
22. M. M. Rodriguez, E. Bill, W. W. Brennessel and P. L. Holland, *Science*, 2011, 334, 780-783.
23. Y. Yu, W. W. Brennessel and P. L. Holland, *Organometallics*, 2007, 26, 3217-3226.
24. J. M. Smith, R. J. Lachicotte and P. L. Holland, *Chem. Commun.*, 2001, DOI: 10.1039/B103635C, 1542-1543.
25. N. A. Eckert, J. M. Smith, R. J. Lachicotte and P. L. Holland, *Inorg. Chem.*, 2004, 43, 3306-3321.
26. E. Bernoud, P. Oulié, R. Guillot, M. Mellah and J. Hannedouche, *Angew. Chem. Int. Ed.*, 2014, 53, 4930-4934.

27. J. M. Smith, A. R. Sadique, T. R. Cundari, K. R. Rodgers, G. Lukat-Rodgers, R. J. Lachicotte, C. J. Flaschenriem, J. Vela and P. L. Holland, *J. Am. Chem. Soc.*, 2006, 128, 756-769.
28. R. E. Cowley, J. Elhaik, N. A. Eckert, W. W. Brennessel, E. Bill and P. L. Holland, *J. Am. Chem. Soc.*, 2008, 130, 6074-6075.
29. J. M. Smith, R. J. Lachicotte, K. A. Pittard, T. R. Cundari, G. Lukat-Rodgers, K. R. Rodgers and P. L. Holland, *J. Am. Chem. Soc.*, 2001, 123, 9222-9223.
30. Y. Yu, A. R. Sadique, J. M. Smith, T. R. Dugan, R. E. Cowley, W. W. Brennessel, C. J. Flaschenriem, E. Bill, T. R. Cundari and P. L. Holland, *J. Am. Chem. Soc.*, 2008, 130, 6624-6638.
31. J. Vela, S. Vaddadi, T. R. Cundari, J. M. Smith, E. A. Gregory, R. J. Lachicotte, C. J. Flaschenriem and P. L. Holland, *Organometallics*, 2004, 23, 5226-5239.
32. J. Vela, J. M. Smith, R. J. Lachicotte and P. L. Holland, *Chem. Commun.*, 2002, DOI: 10.1039/B209389H, 2886-2887.
33. S. A. Stoian, Y. Yu, J. M. Smith, P. L. Holland, E. L. Bominaar and E. Munck, *Inorg. Chem.*, 2005, 44, 4915-4922.
34. Y. Yu, J. M. Smith, C. J. Flaschenriem and P. L. Holland, *Inorg. Chem.*, 2006, 45, 5742-5751.
35. Y. M. Wei Gao, Guang-hua Li, Xiao-ming Liu, Qing Su, Wei Yao, *Chem. Res. Chin. Univ.*, 2005, 21, 240.
36. P. L. Holland, T. R. Cundari, L. L. Perez, N. A. Eckert and R. J. Lachicotte, *J. Am. Chem. Soc.*, 2002, 124, 14416-14424.
37. A. Panda, M. Stender, R. J. Wright, M. M. Olmstead, P. Klavins and P. P. Power, *Inorg. Chem.*, 2002, 41, 3909-3916.
38. T. R. Dugan, J. M. Goldberg, W. W. Brennessel and P. L. Holland, *Organometallics*, 2012, 31, 1349-1360.
39. J. Young, G. A. Yap and K. Theopold, *J. Chem. Crystallogr.*, 2009, 39, 846-848.
40. S. Yao, Y. Xiong, C. Milsmann, E. Bill, S. Pfirrmann, C. Limberg and M. Driess, *Chem. Eur. J.*, 2010, 16, 436-439.
41. N. A. Eckert, E. M. Bones, R. J. Lachicotte and P. L. Holland, *Inorg. Chem.*, 2003, 42, 1720-1725.
42. H. L. Wiencko, E. Kogut and T. H. Warren, *Inorg. Chim. Acta*, 2003, 345, 199-208.
43. B. Horn, S. Pfirrmann, C. Limberg, C. Herwig, B. Braun, S. Mebs and R. Metzinger, *Z. Anorg. Allg. Chem.*, 2011, 637, 1169-1174.
44. N. A. Eckert, A. Dinescu, T. R. Cundari and P. L. Holland, *Inorg. Chem.*, 2005, 44, 7702-7704.
45. S. Wiese, M. J. B. Aguila, E. Kogut and T. H. Warren, *Organometallics*, 2013, 32, 2300-2308.
46. X. Li, J. Ding, W. Jin and Y. Cheng, *Inorg. Chim. Acta*, 2009, 362, 233-237.
47. J. T. York, V. G. Young and W. B. Tolman, *Inorg. Chem.*, 2006, 45, 4191-4198.
48. A. M. Reynolds, E. A. Lewis, N. W. Aboeella and W. B. Tolman, *Chem. Commun.*, 2005, DOI: 10.1039/B418939F, 2014-2016.
49. Y. M. Badiei and T. H. Warren, *J. Organomet. Chem.*, 2005, 690, 5989-6000.
50. N. Carrera, N. Savjani, J. Simpson, D. L. Hughes and M. Bochmann, *Dalton Trans.*, 2011, 40, 1016-1019.
51. N. M. Rajendran, K. Maheswari and N. D. Reddy, *Polyhedron*, 2014, 81, 329-334.
52. C. Shimokawa, J. Teraoka, Y. Tachi and S. Itoh, *J. Inorg. Biochem.*, 2006, 100, 1118-1127.
53. M. Inosako, A. Kunishita, C. Shimokawa, J. Teraoka, M. Kubo, T. Ogura, H. Sugimoto and S. Itoh, *Dalton Trans.*, 2008, DOI: 10.1039/b808678h, 6250-6256.
54. C. Shimokawa, S. Yokota, Y. Tachi, N. Nishiwaki, M. Ariga and S. Itoh, *Inorg. Chem.*, 2003, 42, 8395-8405.
55. S. Yokota, Y. Tachi and S. Itoh, *Inorg. Chem.*, 2002, 41, 1342-1344.
56. A. Kalita, V. Kumar and B. Mondal, *R. Soc. Chem. Adv.*, 2015, 5, 643-649.
57. X. Dai and T. H. Warren, *Chem. Commun.*, 2001, DOI: 10.1039/B105244F, 1998-1999.
58. S. Hong, L. M. R. Hill, A. K. Gupta, B. D. Naab, J. B. Gilroy, R. G. Hicks, C. J. Cramer and W. B. Tolman, *Inorg. Chem.*, 2009, 48, 4514-4523.
59. D. J. E. Spencer, A. M. Reynolds, P. L. Holland, B. A. Jazdzewski, C. Duboc-Toia, L. Le Pape, S. Yokota, Y. Tachi, S. Itoh and W. B. Tolman, *Inorg. Chem.*, 2002, 41, 6307-6321.
60. M. M. Melzer, S. Mossin, A. J. P. Cardenas, K. D. Williams, S. Zhang, K. Meyer and T. H. Warren, *Inorg. Chem.*, 2012, 51, 8658-8660.
61. S. Wiese, Y. M. Badiei, R. T. Gephart, S. Mossin, M. S. Varonka, M. M. Melzer, K. Meyer, T. R. Cundari and T. H. Warren, *Angew. Chem. Int. Ed.*, 2010, 49, 8850-8855.
62. P. O. Oguadinma and F. Schaper, *Inorg. Chim. Acta*, 2009, 362, 570-574.
63. B. A. Jazdzewski, P. L. Holland, M. Pink, V. G. Young, D. J. E. Spencer and W. B. Tolman, *Inorg. Chem.*, 2001, 40, 6097-6107.



64. M. Inosako, C. Shimokawa, H. Sugimoto, N. Kihara, T. Takata and S. Itoh, *Chem. Lett.*, 2007, 36, 1306-1307.
65. E. C. Brown, N. W. Aboeella, A. M. Reynolds, G. Aullón, S. Alvarez and W. B. Tolman, *Inorg. Chem.*, 2004, 43, 3335-3337.
66. E. C. Brown, I. Bar-Nahum, J. T. York, N. W. Aboeella and W. B. Tolman, *Inorg. Chem.*, 2007, 46, 486-496.
67. L. M. R. Hill, B. F. Gherman, N. W. Aboeella, C. J. Cramer and W. B. Tolman, *Dalton Trans.*, 2006, DOI: 10.1039/b609939d, 4944-4953.
68. C. Shimokawa, Y. Tachi, N. Nishiwaki, M. Ariga and S. Itoh, *Bull. Chem. Soc. Jpn.*, 2006, 79, 118-125.
69. D. J. E. Spencer, N. W. Aboeella, A. M. Reynolds, P. L. Holland and W. B. Tolman, *J. Am. Chem. Soc.*, 2002, 124, 2108-2109.
70. P. L. Holland and W. B. Tolman, *J. Am. Chem. Soc.*, 1999, 121, 7270-7271.
71. A. D. Phillips, O. Zava, R. Scopelitti, A. A. Nazarov and P. J. Dyson, *Organometallics*, 2010, 29, 417-427.
72. D. F. Schreiber, Y. Ortin, H. Müller-Bunz and A. D. Phillips, *Organometallics*, 2011, 30, 5381-5395.
73. A. D. Phillips, G. Laurency, R. Scopelitti and P. J. Dyson, *Organometallics*, 2007, 26, 1120-1122.
74. A. D. Phillips, K. Thommes, R. Scopelitti, C. Gandolfi, M. Albrecht, K. Severin, D. F. Schreiber and P. J. Dyson, *Organometallics*, 2011, 30, 6119-6132.
75. H. Huang, R. P. Hughes and A. L. Rheingold, *Polyhedron*, 2008, 27, 734-738.
76. A. Hadzovic and D. Song, *Inorg. Chem.*, 2008, 47, 12010-12017.
77. A. Hadzovic and D. Song, *Organometallics*, 2008, 27, 1290-1298.
78. V. T. Annibale, R. Tan, J. Janetzko, L. M. Lund and D. Song, *Inorg. Chim. Acta*, 2012, 380, 308-321.
79. G. Meier, V. Steck, B. Braun, A. Eißler, R. Herrmann, M. Ahrens, R. Laubenstein and T. Braun, *Eur. J. Inorg. Chem.*, 2014, 2014, 2793-2808.
80. Peter H. M. Budzelaar, Nicolle N. P. Moonen, René d. Gelder, Jan M. M. Smits and Anton W. Gal, *Eur. J. Inorg. Chem.*, 2000, 2000, 753-769.
81. T. N. Hill and G. Steyl, *Acta Crystallogr., Sect. E: Struct. Rep. Online*, 2010, 66, m205.
82. D. W. Shaffer, S. A. Ryken, R. A. Zarkesh and A. F. Heyduk, *Inorg. Chem.*, 2011, 50, 13-21.
